# Supplementary material for: Smart insulin dosing software based on trend arrows is an effective means of controlling hyperglycemia in non-endocrinological inpatients with diabetes: a randomized controlled trial
Source: Research Square preprint supplement (doi:10.21203/rs.3.rs-6878924/v1), 2025-07-25
Supplement: Supplementary file 1 [file eb9f81c310ac7946564e625f.docx]

**Supplementary**

Smart insulin dosage app design program

1. Basic information about the patient: age, sex, height, weight, type of diabetes (T1DM, T2DM, other types).
2. Current medications: insulin use regimen (multiple daily insulin injections, insulin pump, other regimen), total insulin dose (U) in a day.
3. CGM's information：type of CGMs (Silicon, Dexcom, Medtronic), trend arrows of CGMs
4. Current situation: whether the time since the start of the last complete full meal is greater than 3h, glycemic control requirements (tight control, average control, lax control), enter current capillary blood glucose value (mmol/L).
5. Output: recommendations for insulin adjustments (residual active insulin, additional insulin doses, or doses requiring carbohydrate supplementation).

Table S1 Comparison of patients with TIR greater than 70% and those with TIR less than 70%

| Parameters | TIR≥70% (n=25) | TIR＜70% (n=61) | *P* |
| --- | --- | --- | --- |
| Age (year) | 55 (41.5, 63.5) | 59 (47.5, 62.5) | 0.389 |
| Sex(male) | 16 (64.0%) | 38 (62.3%) | 0.882 |
| BMI (kg/m2) | 23.82 (21.79, 25.13) | 23.51 (21.26, 25.95) | 0.868 |
| FPG (mmol/L) | 8.09 (7.00, 8.97) | 9.78 (7.85, 13.13) | 0.006 |
| FCP (pg/dL) | 1.22 (0.58, 2.53) | 1.71 (0.94, 2.62) | 0.317 |
| HbA1c (%)* | 9.2 (8.25, 10.5) | 9.6 (8.02, 11.08) | 0.674 |
| Total insulin(U) | 222.0 (160.0, 271.5) | 247 (203.5, 312.5) | 0.016 |
| Average daily insulin (U/day) | 32.14 (25.14, 40.93) | 39.14 (32.23, 48.22) | 0.002 |
| Total insulin dose /Weight (U/kg) | 0.51 (0.38, 0.61) | 0.63 (0.50, 0.76) | 0.007 |
| App group (yes) | 17 (68.0%) | 26 (42.6%) | 0.033 |
| Cirrhosis N (%) | 8 (32.0%) | 23 (37.7%) | 0.671 |
| Hypoglycemia N (%) | 5 (20.0%) | 10 (16.4%) | 0.757 |

* HbA1c at baseline
